# Supplementary material
Source: PubMed Central journal article supplement (PMC4955067)
Supplement: thnov06p1703s1.pdf [file thnov06p1703s1.pdf]

## Supporting Information

# **Cancer Theranostic Nanoparticles Self-Assembled from Amphiphilic Small Molecules with Equilibrium Shift-Induced Renal Clearance**

Yuan Ma<sup>1,\*</sup>, Quanbing Mou<sup>1,\*</sup>, Mo Sun<sup>1</sup>, Chunyang Yu<sup>1</sup>, Jianqi Li<sup>2</sup>, Xiaohua Huang,<sup>3</sup> Xinyuan  
Zhu<sup>1,✉</sup>, Deyue Yan<sup>1</sup>, and Jian Shen<sup>3,✉</sup>

<sup>1</sup> School of Chemistry and Chemical Engineering, State Key Laboratory of Metal Matrix Composites, Shanghai Jiao Tong University, 800 Dongchuan Road, Shanghai, 200240, P. R. China.

<sup>2</sup> Department of Physics and Shanghai Key Laboratory of Functional Magnetic Resonance Imaging, East China Normal University, North Zhongshan Road 3663, Shanghai, 200062, P. R. China.

<sup>3</sup> Jiangsu Collaborative Innovation Center of Biomedical Functional Materials, Jiangsu Key Laboratory of Biomedical Materials, College of Chemistry and Materials Science, Nanjing Normal University, Nanjing, 210046, P. R. China.

✉ Corresponding authors: Xinyuan Zhu, Ph.D., School of Chemistry and Chemical Engineering, State Key Laboratory of Metal Matrix Composites, Shanghai Jiao Tong University, 800 Dongchuan Road, Shanghai, 200240, P. R. China. Jian Shen, Ph.D., Jiangsu Collaborative Innovation Center of Biomedical Functional Materials, Jiangsu Key Laboratory of Biomedical Materials, College of Chemistry and Materials Science, Nanjing Normal University, Nanjing, 210046, P. R. China. E-mail: xyzhu@sjtu.edu.cn and shenjianbio@hotmail.com

\*Equal contribution

## 1. Experiment section

*Critical aggregation concentration (CAC):* The CAC value of Gd(DTPA-CPT) was measured by fluorescence spectroscopy using pyrene as a hydrophobic fluorescence probe. 20  $\mu\text{L}$  of pyrene solutions in acetone ( $3 \times 10^{-5} \text{ mol L}^{-1}$ ) were added into 2 mL of aqueous Gd(DTPA-CPT) solutions with serial concentrations. Thereafter the solutions were kept at room temperature for 24 h. Then the fluorescence spectra were recorded at an excitation wavelength of 310 nm, and the fluorescence emission was collected at 397 nm. The CAC value was determined by extrapolating the inflection point of fluorescence intensity.

*Model and simulation method:* The relative stability of Gd(DTPA-CPT) and PEG-*b*-PCL nanoparticles was investigated by using molecular dynamics simulations. Here, the MARTINI force field<sup>[1]</sup> with four-to-one mapping strategy is used to represent the molecules in the simplified model; that is, on average, four atoms are represented by a single interaction center. Based on the mapping rule of the MARTINI force field, we constructed coarse-grained (CG) model for Gd(DTPA-CPT) and PEG-*b*-PCL, respectively. There are four main types of beads: polar (P), nonpolar (N), apolar (C) and charged (Q) to represent the chemical nature of the underlying atomistic structures. The bead types for smaller particles representing 2-3 atoms including those in ring are labeled by a prefix "S". Gd(DTPA-CPT) and PEG-*b*-PCL were respectively represented by 19 and 113 CG beads (Figure S15).

Table S1 provides a summary of the detailed simulation setup used in this work. Firstly, Gd(DTPA-CPT) and PEG-*b*-PCL nanoparticles were pre-assembled by the PACKMOL<sup>[2]</sup> program (Figure S16). Secondly, the configurations were optimized using the L-BFGS algorithm with an energy tolerance of  $10.0 \text{ kJ mol}^{-1} \text{ nm}^{-1}$ . A cutoff value of 1.0 nm was used for non-bond interactions. Lastly, 100 ns long CG molecular dynamics simulations of Gd(DTPA-CPT) and PEG-*b*-PCL

1 nanoparticles in aqueous solution were performed with the cubic box, respectively. The last 10 ns  
2 equilibrated trajectory was further used to assess the structures and energies. All the calculations  
3 were employed by using GROMACS 4.5.5<sup>[3]</sup> in the NPT ensemble. A 40 fs time step is used to  
4 integrate the equations of motion with the leap-frog algorithm. The periodic boundary is used in the  
5 x, y and z directions. The neighbor list is updated every 10 steps with a cutoff 1.2 nm. The standard  
6 shift function of GROMACS is used to deal with the LJ and Coulomb potentials. The LJ potential is  
7 shifted from 0.9 nm to a cutoff of 1.0 nm. The Coulomb potential is shifted from 0.0 nm to a cutoff  
8 of 1.0 nm. The initial velocities of beads are generated based on the Maxwell distribution at system  
9 temperature. The temperature and pressure are controlled at 303 K and 1 atm by the Berendsen  
10 thermostat and barostat method.

11 *Dynamic dialysis experiments:* 2.0 mL of Gd(DTPA-CPT) nanoparticles, free CPT and  
12 pyrene-labeled PEG-*b*-PCL nanoparticles aqueous solutions (1.0 mg mL<sup>-1</sup>) were placed in the  
13 dialysis bag, respectively. Dialysis experiments were conducted after immersion of the dialysis bag  
14 in 50 mL of PBS (pH 7.4). Aliquots (2 mL) were withdrawn from outside the dialysis bag at  
15 different time intervals. 50 mL of phosphate buffer (pH 7.4) was added outside the dialysis bag at  
16 different time intervals (16 h, 32 h, 48 h). After dilution, small molecular Gd(DTPA-CPT) could  
17 pass through the dialysis bag, which was verified by HPLC. The amount of small molecular  
18 Gd(DTPA-CPT), free CPT and pyrene-labeled PEG-*b*-PCL unimer was determined by UV-vis  
19 spectrophotometry.

20 *In vitro drug release from Gd(DTPA-CPT) nanoparticles:* The *in vitro* drug release behavior  
21 of Gd(DTPA-CPT) nanoparticles in different environments was detected using high-performance  
22 liquid chromatography (HPLC, Agilent 1260 Infinity system, Agilent Inc.). The Gd(DTPA-CPT)  
23 nanoparticles (0.4 mg mL<sup>-1</sup>) were dispersed in different environments (phosphate buffer (pH 7.4),

1 acetate buffer (pH 5.0), phosphate buffer (pH 7.4) containing 17 U mL<sup>-1</sup> esterase and acetate buffer  
2 (pH 5.0) containing 17 U mL<sup>-1</sup> esterase). The solutions were incubated at 37 °C in a laboratory  
3 shaker with gentle shaking (100 rpm) and sampled at 2, 4, 6, 8, 10, 12, 24, 36, 48 and 60 h,  
4 respectively. Subsequently, these samples were freeze-dried and the residue was redissolved with 1  
5 mL of DMSO. The amount of CPT was determined by HPLC using acetonitrile and water as mobile  
6 phases. Each experiment was replicated three times and the results presented are the average values.

7 *Cell culture:* LoVo cells (a human colon cancer cell line) were cultured in Ham's F12K  
8 medium with 2 mM L-glutamine adjusted to contain 1.5 g L<sup>-1</sup> sodium bicarbonate. HepG2 cells (a  
9 human hepatocarcinoma cell line) were cultured in DMEM. The culture mediums contained 10%  
10 FBS and antibiotics (50 units mL<sup>-1</sup> penicillin and 50 units mL<sup>-1</sup> streptomycin). All of the cells were  
11 cultured at 37 °C in a humidified atmosphere containing 5% CO<sub>2</sub>.

12 *In vitro anticancer effects of Gd(DTPA-CPT) nanoparticles:* The LoVo cells and HepG2 cells  
13 were chosen to evaluate the anticancer effects of Gd(DTPA-CPT) nanoparticles by MTT assay.  
14 Meanwhile, the free drug CPT, Gd(DTPA) and CPT/Gd(DTPA) mixture were used as controls. The  
15 cells were seeded in 96-well plates at a density of  $1 \times 10^4$  cells per well in 200 µL medium. After 24  
16 h incubation, the cells obtained 70-80% confluence. Then the culture medium was removed and  
17 replaced with 200 µL fresh medium containing serial dilutions of Gd(DTPA-CPT) nanoparticles,  
18 CPT, Gd(DTPA) and CPT/Gd(DTPA) mixture. The cells without any treatment were set as control.  
19 For Lovo cells, the cells were cultured for another 24 h, 48 h and 72 h at 37 °C under 5% CO<sub>2</sub>,  
20 respectively. For HepG2 cells, the cells were cultured for another 48 h at 37 °C under 5% CO<sub>2</sub>.  
21 Thereafter, 20 µL of MTT assay stock solution (5 mg mL<sup>-1</sup> in PBS) was added to each well and the  
22 cells were incubated for another 4 h. Then culture medium was removed and 200 µL DMSO was  
23 added into each well to dissolve the formazan crystals. Then the plates were vibrated for 10 min and

1 the absorbance of each well was measured in a BioTek® Synergy H4 at a wavelength of 490 nm.

2 *Cellular uptake studies of Gd(DTPA-CPT) nanoparticles:* Confocal laser scanning microscopy  
3 (CLSM) was chosen to study the cellular uptake of Gd(DTPA-CPT) nanoparticles by LoVo cells.  
4 LoVo cells were seeded in glass-bottom culture dishes at a density of  $5.0 \times 10^5$  cells per dish in 1.5  
5 mL of complete Ham's F12K medium and cultured for 24 h. Then the medium was replaced with  
6 1.5 mL medium containing Gd(DTPA-CPT) nanoparticles at a concentration of 30  $\mu$ M. The cells  
7 were incubated at 37 °C for 3 h. Then the culture medium was removed and the cells were rinsed  
8 with PBS three times and fixed with 4% paraformaldehyde for 30 min at room temperature.  
9 Subsequently, the cells were treated with 0.5% Triton X-100 in ice bath for 15 min, and then treated  
10 with RNase (100  $\mu$ g L<sup>-1</sup>) at 37 °C for 30 min. Finally, the cells were stained with 2.4 nM YOYO-1  
11 at room temperature for 20 min and rinsed with PBS three times. The cells were observed with  
12 Nikon Ti-E inverted motorized microscope.

13 *Flow cytometry:* For flow cytometry, LoVo cells were seeded in 6-well plates at a density of  
14  $5.0 \times 10^5$  cells per well in 1.5 mL complete Ham's F12K medium and cultured for 24 h. Then the  
15 medium was replaced with 1.5 mL medium containing Nile-red loaded Gd(DTPA-CPT)  
16 nanoparticles at a concentration of 30  $\mu$ M. Then, the cells were incubated at 37 °C for  
17 predetermined intervals, 5, 15, 30, 45 and 60 min. Thereafter, the culture medium was removed and  
18 the cells were washed with PBS three times and then harvested. The amount of intracellular  
19 fluorescent signal of Nile-red was quantified using BD Accuri™ C6 flow cytometer, indicating the  
20 amount of Gd(DTPA-CPT) nanoparticles internalized by LoVo cells.

21 *Cell apoptosis assay:* LoVo cells were seeded in 6-well plates at a density of  $5.0 \times 10^5$  cells  
22 per well and cultured for 24 h. Then the LoVo cells were treated with Gd(DTPA-CPT) and CPT at  
23 the same concentration (3  $\mu$ M) for 24 h. The untreated LoVo cells were used as control. The

1 apoptosis experiments were performed using a combined staining with FITC-Annexin V/PI (FITC,  
2 fluorescein isothiocyanate, PI, propidium iodide) flow cytometry assay. Briefly, untreated and  
3 treated cells ( $1.0 \times 10^5$ ) were suspended in  $1 \times$  annexin binding buffer, with the addition of  
4 FITC-labeled Annexin V and PI, and incubated at room temperature for 15 min. After incubation,  
5 the samples were analyzed by BD Accuri™ C6 flow cytometer to acquire 10,000 events per sample.  
6 Finally, the cell populations were analyzed with the FlowJo software.

7 *Hemolysis assay:* 10 mL of blood from the ear artery of a male New Zealand white rabbit was  
8 collected. The blood was subsequently centrifuged at 2000 rpm for 10 min at 4 °C. The plasma  
9 supernatant was removed, and the erythrocytes were resuspended in ice cold PBS. The cells were  
10 again centrifuged at 2000 rpm for 10 min at 4 °C. This was repeated more than two times to ensure  
11 the removal of any released hemoglobin. After the supernatant was removed, the cells were  
12 resuspended in PBS to achieve a 2% w/v red blood cell (RBC) solution. The Gd-DTPA-CPT and  
13 the reference compounds were also prepared at serial concentration (0.02, 0.1, 0.2, 1 and 2 mg mL<sup>-1</sup>)  
14 with PBS (pH=7.4). Then 2 mL of the Gd-DTPA-CPT or the reference compounds (PEI and  
15 Dextran) prepared in PBS was added to 2 mL of the 2% w/v RBC solution in centrifuge tubes and  
16 incubated for 1 h at 37 °C, respectively. Complete hemolysis was attained by treatment with 2% v/v  
17 Triton-X, yielding the 100% hemolysis value. After incubation, the centrifuge tubes were  
18 centrifuged, and the supernatants were collected. The release of hemoglobin was determined by  
19 spectrophotometric analysis of the supernatant at 545 nm. Results were expressed as the amount of  
20 hemoglobin release induced by the compounds as a percentage of the total.

21 *Tumor xenografts:* All animal experiments were conducted in agreement with the guidelines of  
22 the Institutional Animal Care and Use Committee of Shanghai Jiao Tong University. LoVo cells  
23 were harvested and pelleted by centrifugation and re-suspended in sterile PBS.  $2 \times 10^6$  cells were

1 injected into male Balb/c nude mice (4 weeks old, Chinese Academy of Sciences of Shanghai). The  
2 studies were performed when the tumor volume reached approximately 200 mm<sup>3</sup>.

3 *In vitro MRI relaxivity measurements:* The longitudinal relaxation rates ( $1/T_1$ ) of  
4 Gd(DTPA-CPT) nanoparticles in aqueous solution were measured on 3 T Siemens Magnetom Trio  
5 Tim, using a  $T_1$ -weighted MR image (repetition times (TR) were 24, 100, 200, 400, 600, 900, 1200,  
6 2000, 3000, 5000 ms, echo time (TE) = 11 ms).  $T_1$  values of Gd(DTPA-CPT) nanoparticle solutions  
7 and Gd(DTPA) (Magnevist<sup>®</sup>, Bayer Healthcare) solutions with different Gd concentrations ranging  
8 from 0.5 to 2.5 mM in water were measured. The Gd concentration was measured using ICP-AES.  
9 Longitudinal relaxivity ( $r_1$ ) was calculated as the slope of  $1/T_1$  vs the concentration of Gd.

10 According to the theory for MRI contrast agent, the overall measured relaxivity ( $R_1^{\text{obs}}$ ) is a  
11 result of different contributions as indicated by:

$$R_1^{\text{obs}} = R_{1p}^{\text{IS}} + R_{1p}^{\text{OS}} + R_1^{\text{W}}$$

13 where  $R_{1p}^{\text{IS}}$  and  $R_{1p}^{\text{OS}}$  are the inner-sphere and outer-sphere relaxation enhancement in the presence  
14 of the paramagnetic complex at 1 mM concentration, respectively, and  $R_1^{\text{W}}$  is the relaxation rate of  
15 the water solvent in the absence of the paramagnetic complex. In addition, after calculation, the  
16 relaxivity of classical gadolinium complexes is related to the rotational correlation time  $\tau_R$ , the  
17 coordination number  $q$ , the exchange rate  $\tau_M$  and the electronic relaxation time  $T_{1E}$ . The rotational  
18 correlation time  $\tau_R$  is strictly related to the size and the rigidity of the contrast agent.<sup>[4]</sup>  
19 Gd(DTPA-CPT) self-assembly into nanoparticles can reduce the molecular tumbling of contrast  
20 agents and thus increase the rotational correlation time  $\tau_R$ . Hence, the relaxivity of Gd(DTPA-CPT)  
21 nanoparticles is slightly higher than that of Gd(DPTA).

22 *In vivo MRI experiments:* *In vivo* MRI experiments were performed on anesthetized Balb/c  
23 male nude mice bearing LoVo tumors with 4% chloral hydrate under authorization of the regional

1 ethic committee for animal experiments. The experiments were conducted on a 3 T Siemens  
2 Magnetom Trio Tim, using a  $T_1$ -weighted MR image (repetition time (TR) = 500 ms, echo time  
3 (TE) = 14 ms, slice thickness = 1.0 mm, field of view (FoV):  $49 \times 99$  and  $50 \times 50$  respectively and  
4 matrix =  $192 \times 384$  and  $512 \times 512$ , respectively). The Gd(DTPA-CPT) nanoparticles and  
5 Gd(DTPA) solutions were intravenously injected into the mice via tail vein at a dose of 0.10 mmol  
6  $\text{kg}^{-1}$ , respectively. The mice were scanned before and after the administration of the contrast agent.

7 *Pharmacokinetic studies:* Sprague-Dawley (SD) rats (~200 g) were chosen to study the  
8 pharmacokinetics of Gd(DTPA-CPT) nanoparticles and free Gd(DTPA). Rats were randomly  
9 divided into two groups (n = 4). The Gd(DTPA-CPT) nanoparticles and free Gd(DTPA) solutions  
10 were intravenously injected via tail vein at a dose of 0.10 mmol  $\text{kg}^{-1}$ . Then, blood samples (0.5 mL)  
11 were collected from each animal at 5 min, 15 min, 30 min, 1 h, 2.5 h, 4 h, 5 h, 6 h, using  
12 retro-orbital blood collection method. Before inductively coupled plasma mass spectrometry  
13 (ICP-MS) analysis, the blood samples were digested with nitric acid for 24 h. After cooling down,  
14 the digestion solutions were filled up to 25 mL with water and analyzed by ICP-MS (Agilent Inc.).

15 *Biodistribution studies:* The biodistribution studies of Gd(DTPA-CPT) nanoparticles and  
16 Gd(DTPA) were performed on Balb/c male nude mice as mentioned above. The mice were  
17 randomly divided into two groups (n = 4), and intravenously injected via tail vein with  
18 Gd(DTPA-CPT) nanoparticles and Gd(DTPA) aqueous solution at a dose of 0.10 mmol  $\text{kg}^{-1}$ . Then  
19 the mice were sacrificed at 0.5 h post-administration., and the heart, liver, spleen, lung, kidney, and  
20 tumor were excised, washed, and weighted. Thereafter, the organs and tumors were digested in aqua  
21 regia at 70 °C until the solution was colorless and clear. Thereafter, the Gd content was analyzed  
22 with ICP-MS.

1        *In vivo anticancer experiments:* When the tumor size reached  $\sim 50 \text{ mm}^3$ , the LoVo  
2 tumor-bearing mice were randomly divided into five groups (6 mice/group). Therefore, the mice in  
3 different treatment groups were intravenously injected via the tail vein with PBS, CPT, Gd(DTPA),  
4 Gd(DTPA-CPT) nanoparticles and Gd(DTPA)/CPT mixture at doses of  $0.029 \text{ mmol kg}^{-1}$  (low dose)  
5 or  $0.10 \text{ mmol kg}^{-1}$  (high dose) once every 3 days, respectively. The tumor sizes and the body  
6 weights of mice were measured every other day after treatments. Tumor volume ( $V$ ) was  
7 determined by the following equation:  $V = ab^2/2$ , where  $a$  is the length and  $b$  is the width of the  
8 tumor. The tumor volume was normalized to its initial size before any treatment. After 27 days  
9 postinjection, the mice were sacrificed, and tumors were separated for histopathological analysis.

10        *Histological examination (H&E) and immunohistochemical analysis:* 3 days after the last  
11 treatment, the mice were sacrificed, and tumors were separated and cut into small pieces, fixed in  
12 4% paraformaldehyde for 8 h. Then the tissues were embedded in paraffin and cut into  $5 \mu\text{m}$   
13 sections for H&E staining and immunohistochemical analysis. The sections were immunostained  
14 with an antibody against PCNA (proliferating cell nuclear antigen) to detect proliferating cells.  
15 Typically, the sections were treated with 3% hydrogen peroxide aqueous solution for 15 min to  
16 quench endogenous peroxidase activity, and then heated to boiling in EDTA antigen retrieval  
17 solution for 10 min in water bath for antigen retrieval. Then the sections were allowed to cool  
18 down, rinsed with PBS three times. Subsequently, the sections were treated with goat serum in TBS  
19 for 20 min to block non-specific binding sites, followed by incubation with PCNA antibody (1:100)  
20 for 1 h at room temperature. Then, the sections were rinsed with PBS three times, incubated with  
21 goat anti-mouse HRP secondary antibody (1:1000) followed by colorimetric detection with  
22 diaminobenzidine (DAB) as chromogen. Finally, the sections were counterstained with hematoxylin  
23 and prepared for mounting. Finally, images were taken by using a Nikon ECLIPSE Ti microscope.

2. Supplementary Figures and tables

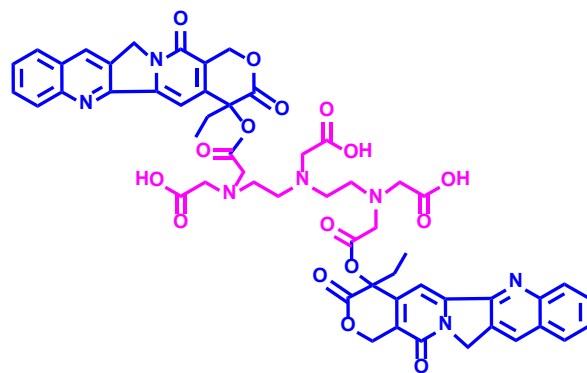

DTPA<sup>-</sup>CPT<sub>2</sub>

Figure S1. The side reaction was negligible for DTPA-CPT<sub>2</sub>.

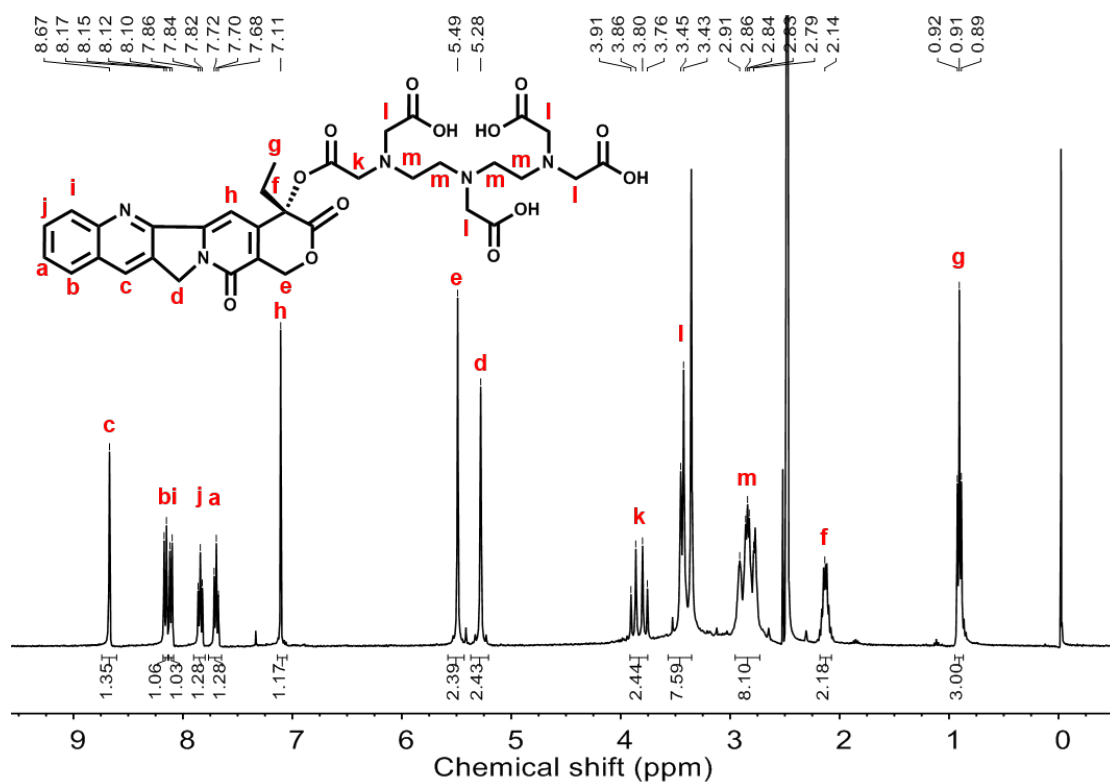

Figure S2. <sup>1</sup>H NMR spectrum of DTPA-CPT in DMSO-*d*<sub>6</sub>.

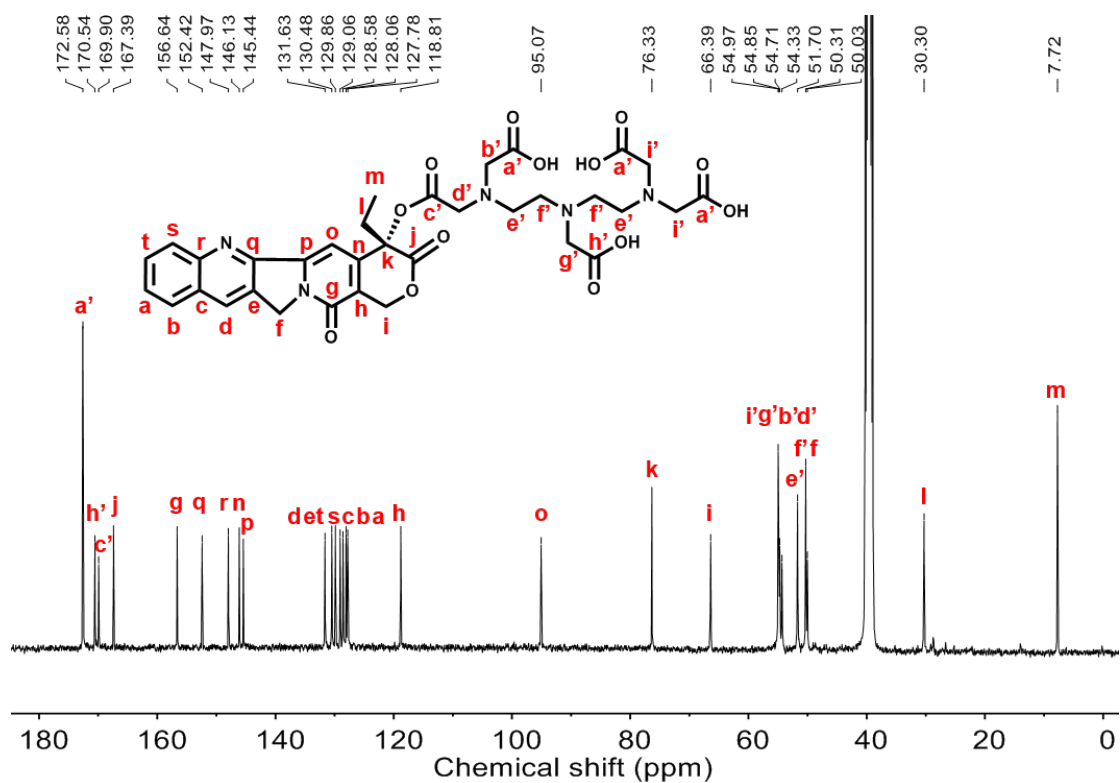

1

2 **Figure S3.**  $^{13}\text{C}$  NMR spectrum of DTPA-CPT in  $\text{DMSO-}d_6$ .

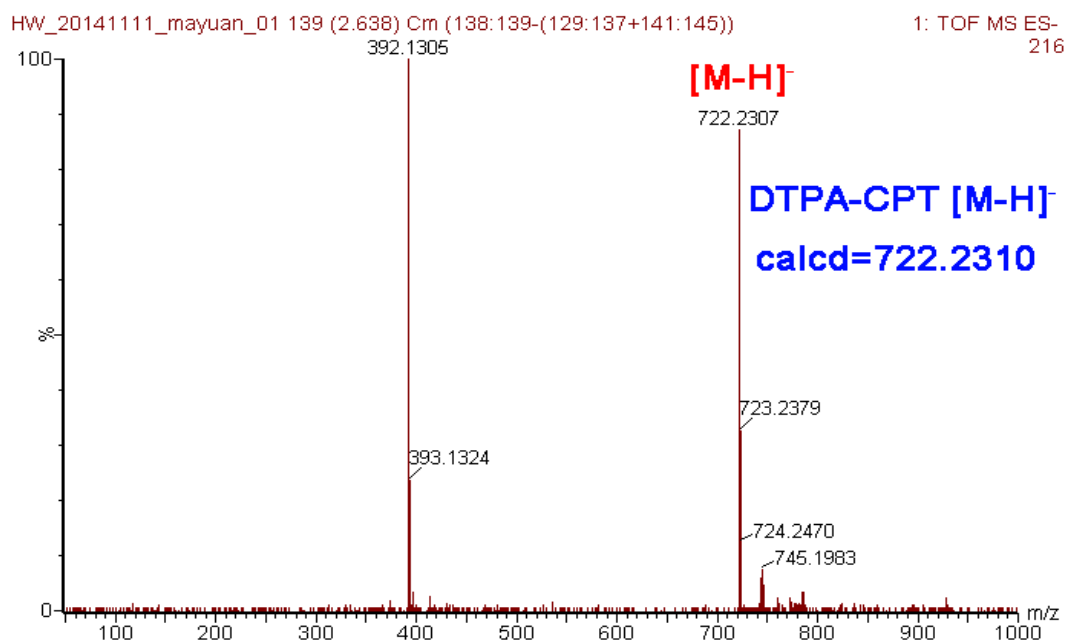

3

4 **Figure S4.** Mass spectrum of DTPA-CPT.

5 **Figure S4** indicates that the molecular weight of DTPA-CPT ( $m/z$ ,  $[\text{M-H}]^-$ ) is 722.2307, which is  
 6 consistent with the calculated value ( $m/z$ ,  $[\text{M-H}]^-$ , 722.2310).

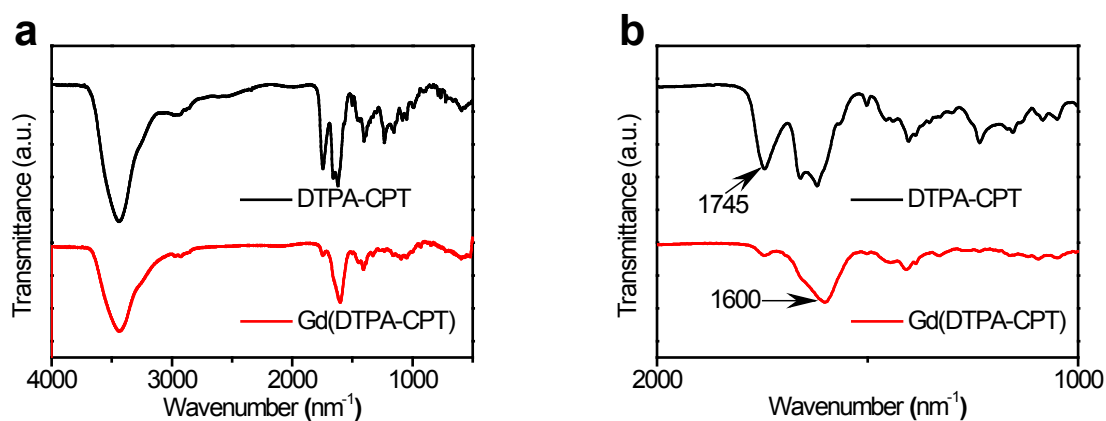

**Figure S5.** (a) FTIR spectra of DTPA-CPT and Gd(DTPA-CPT). (b) A partial FTIR spectra of DTPA-CPT and Gd(DTPA-CPT) in the range of 2000 ~ 1000  $\text{cm}^{-1}$ .

In the FTIR spectrum of DTPA-CPT, a strong C=O stretching absorption band at 1745  $\text{cm}^{-1}$  can be ascribed to the carboxyl stretching vibration. In the FTIR spectrum of Gd(DTPA-CPT), the band at 1600  $\text{cm}^{-1}$  corresponds to the stretching bands of C=O of  $\text{COO}^-$ . The shift of the bands indicates the coordination between the  $\text{Gd}^{3+}$  and carboxylic ion.

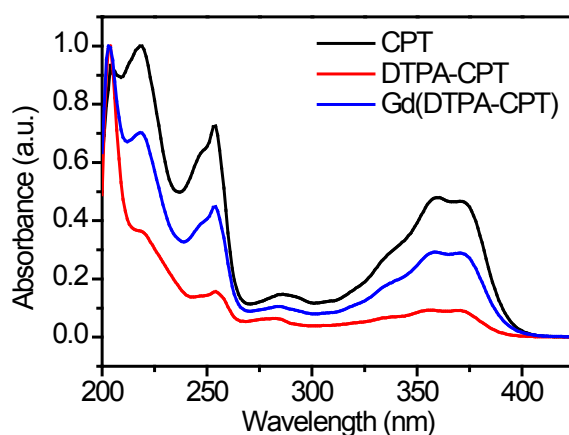

**Figure S6.** UV-vis spectra of CPT, DTPA-CPT, and Gd(DTPA-CPT) in methanol.

Compared with the UV-vis absorption of free CPT and DTPA-CPT at 359 nm, a 3 nm blue-shift is observed in the absorption of the Gd(DTPA-CPT) at 356 nm. The UV-vis results demonstrate the coordination between the  $\text{Gd}^{3+}$  and carboxylic ion.

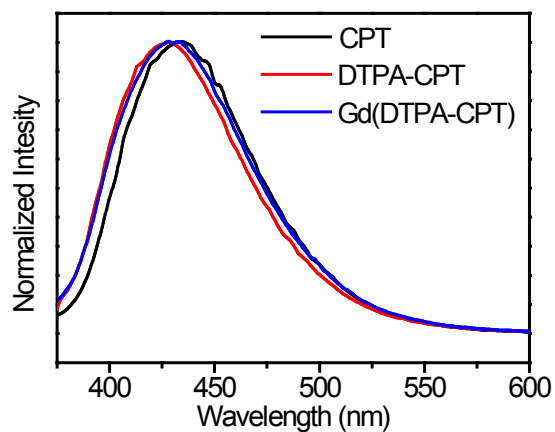

**Figure S7.** Fluorescence emission spectra of CPT ( $\lambda_{\text{ex}} = 359 \text{ nm}$ ,  $\lambda_{\text{em}} = 434 \text{ nm}$ ), DTPA-CPT ( $\lambda_{\text{ex}} = 359 \text{ nm}$ ,  $\lambda_{\text{em}} = 428 \text{ nm}$ ), Gd(DTPA-CPT) ( $\lambda_{\text{ex}} = 359 \text{ nm}$ ,  $\lambda_{\text{em}} = 430 \text{ nm}$ ) in methanol.

The maximum emission peaks of free CPT and DTPA-CPT are 428 nm. For the Gd(DTPA-CPT), the maximum emission red-shifts to 435 nm, which confirms that the Gd(DTPA-CPT) is synthesized successfully.

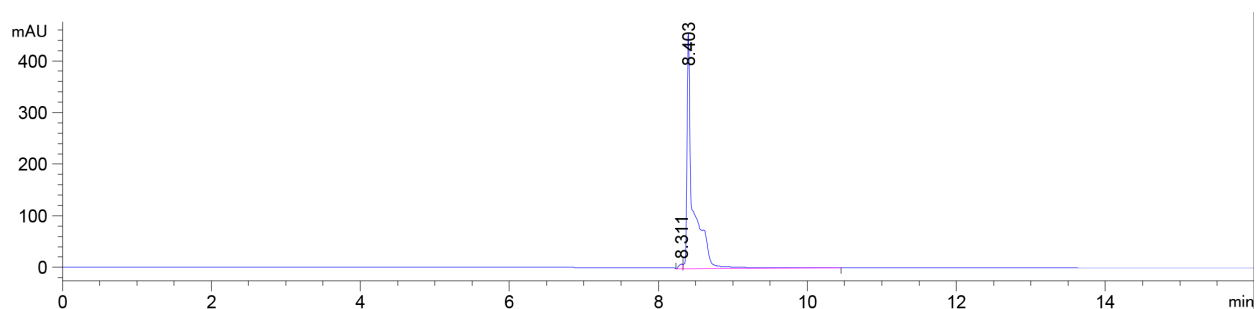

**Figure S8.** HPLC analysis of DTPA-CPT.

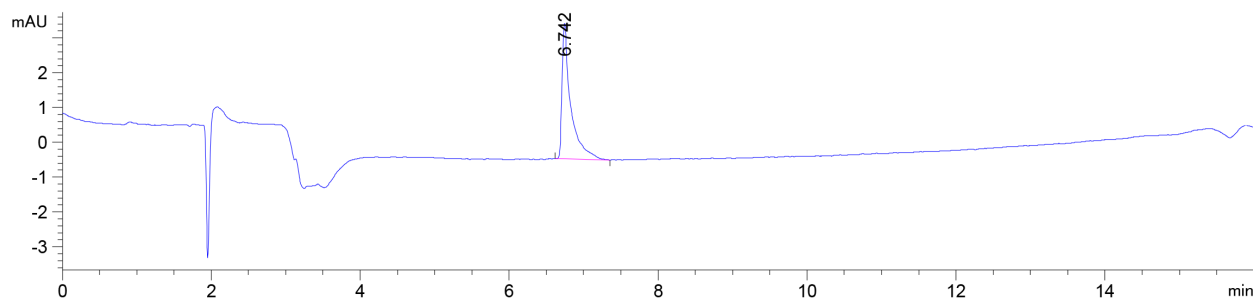

**Figure S9.** HPLC analysis of Gd-DTPA-CPT.

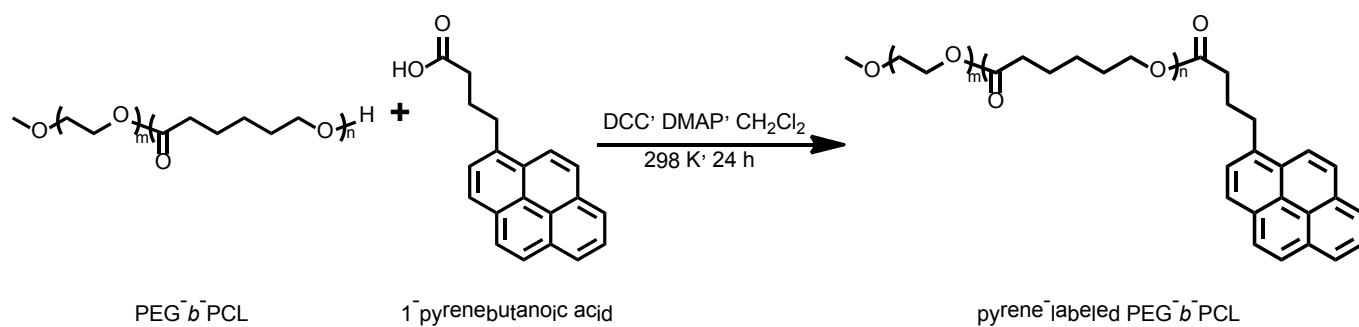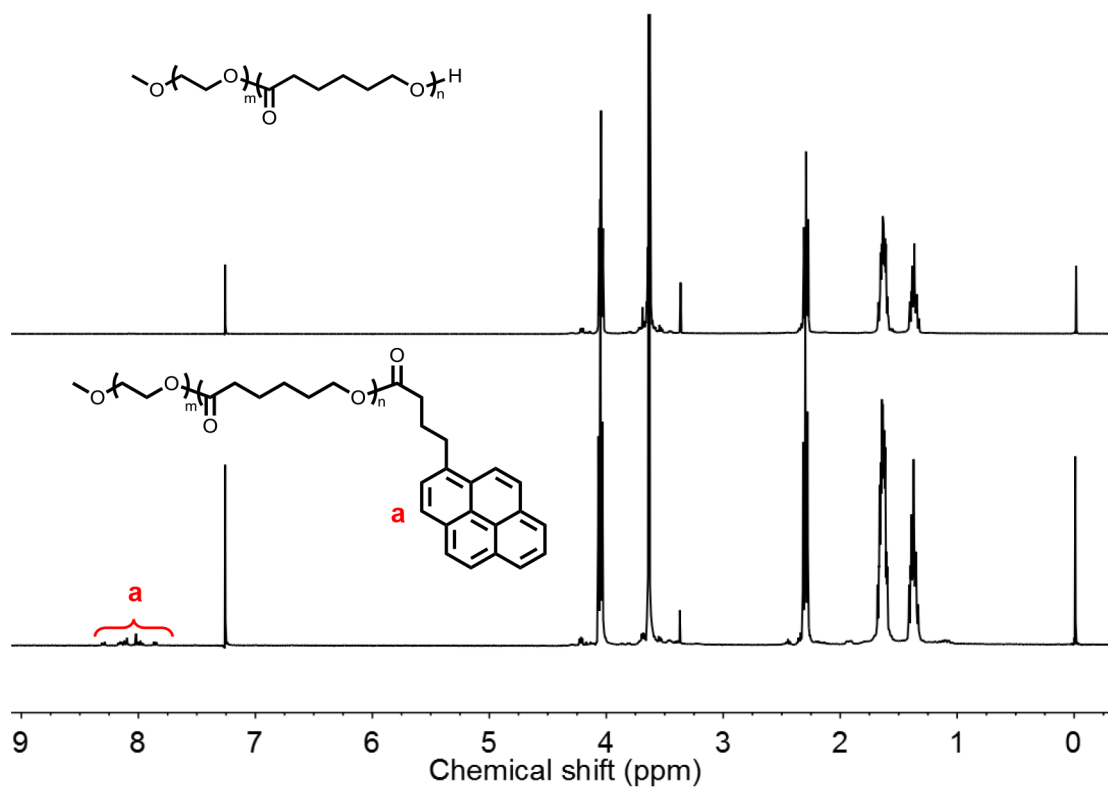

**Figure S11.**  $^1\text{H}$  NMR spectrum of PEG-*b*-PCL and pyrene-labeled PEG-*b*-PCL in  $\text{CDCl}_3$ . The signals (a) belong to the protons of pyrene.



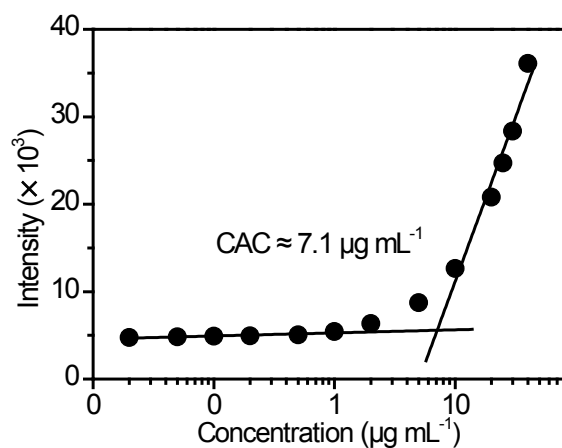

**Figure S14.** The fluorescence intensity of pyrene at 397 nm under excitation as a function of the logarithm of Gd(DTPA-CPT) concentration.

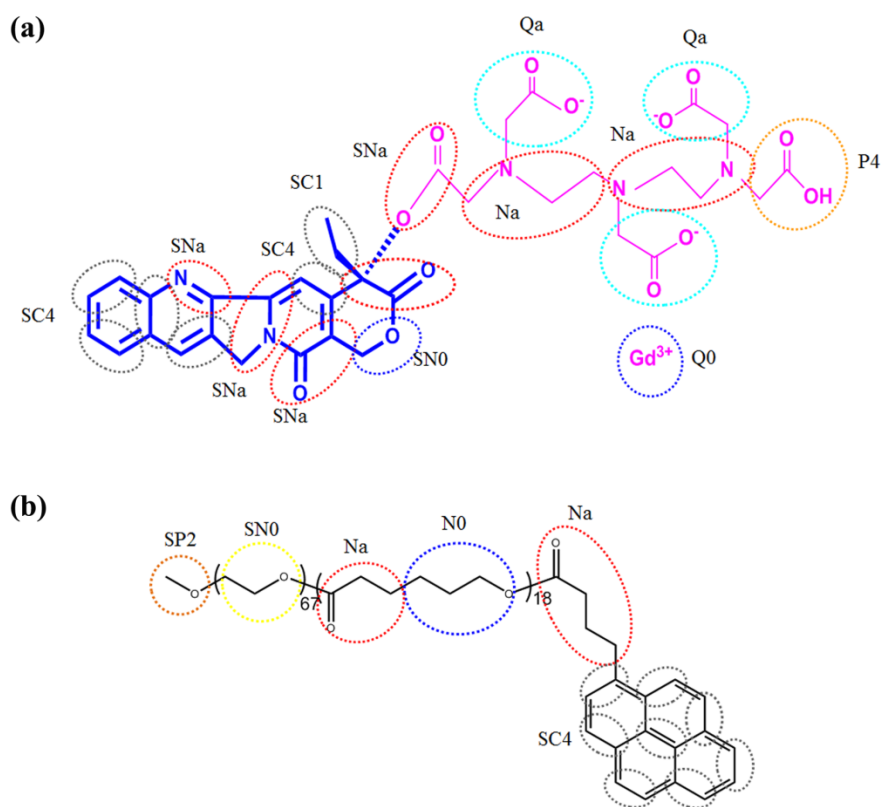

**Figure S15.** Mapping from atomistic structures to CG bead for (a) Gd(DTPA-CPT) and (b) PEG-*b*-PCL models.

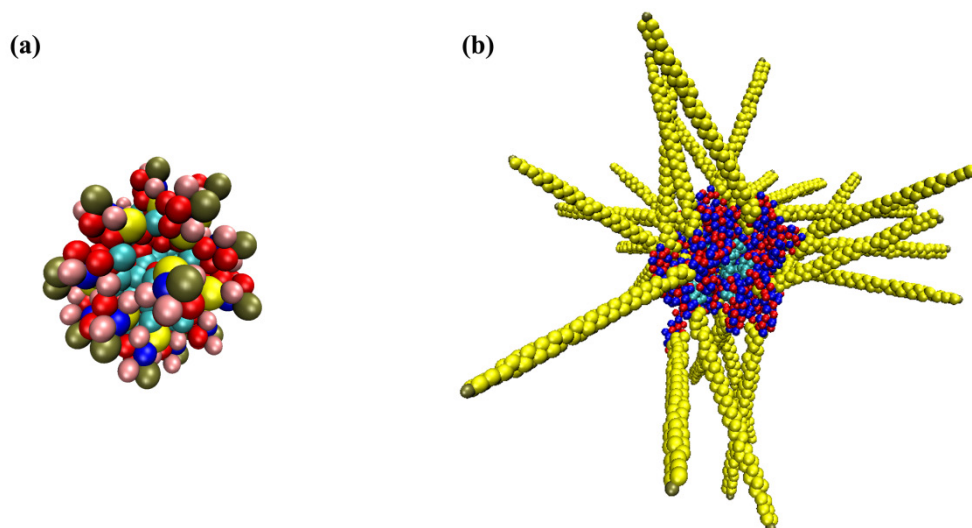

**Figure S16.** The pre-assembled nanoparticle structures for (a) Gd(DTPA-CPT) and (b) PEG-*b*-PCL models.

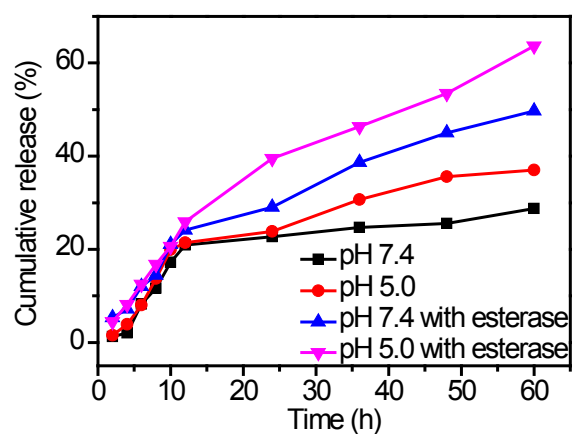

**Figure S17.** *In vitro* CPT release kinetics from Gd(DTPA-CPT) nanoparticles at 37 °C in different environments (phosphate buffer (pH 7.4), acetate buffer (pH 5.0), phosphate buffer (pH 7.4) containing 17 U mL<sup>-1</sup> esterase and acetate buffer (pH 5.0) containing 17 U mL<sup>-1</sup> esterase).

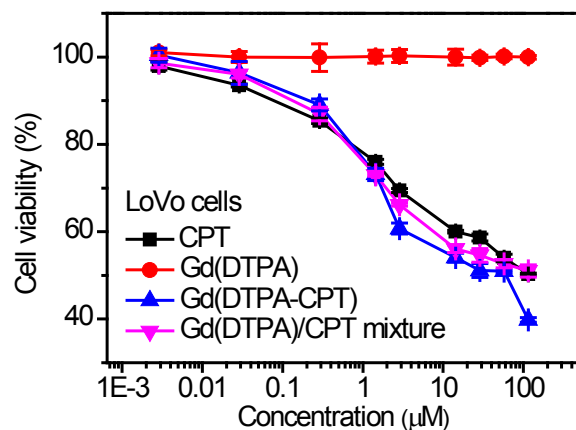

**Figure S18.** Cell viability assay of CPT, Gd(DTPA), Gd(DTPA-CPT) nanoparticles and Gd(DTPA)/CPT mixture to LoVo cell line determined by MTT assay after 24 h incubation, respectively.

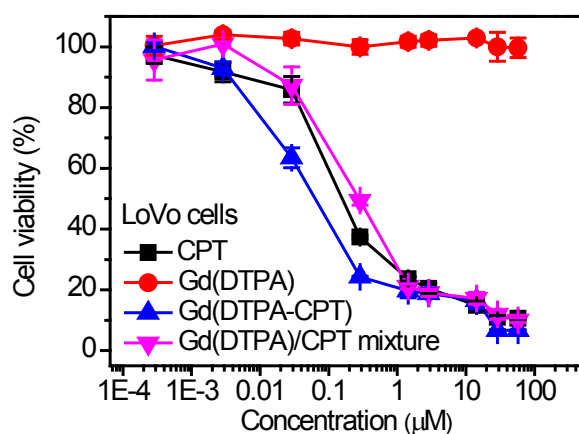

**Figure S19.** Cell viability assay of CPT, Gd(DTPA), Gd(DTPA-CPT) nanoparticles and Gd(DTPA)/CPT mixture to LoVo cell line determined by MTT assay after 72 h incubation, respectively.

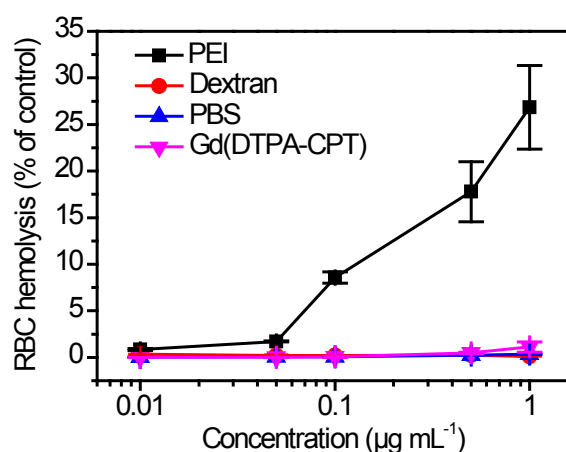

1

2 **Figure S20.** Hemolysis assay of Gd-DTPA-CPT compared with PEI, dextran and PBS with  
 3 different concentrations (Triton X-100 was used as a 100% hemolysis value). Data are presented as  
 4 the average  $\pm$  standard deviation ( $n = 3$ ).

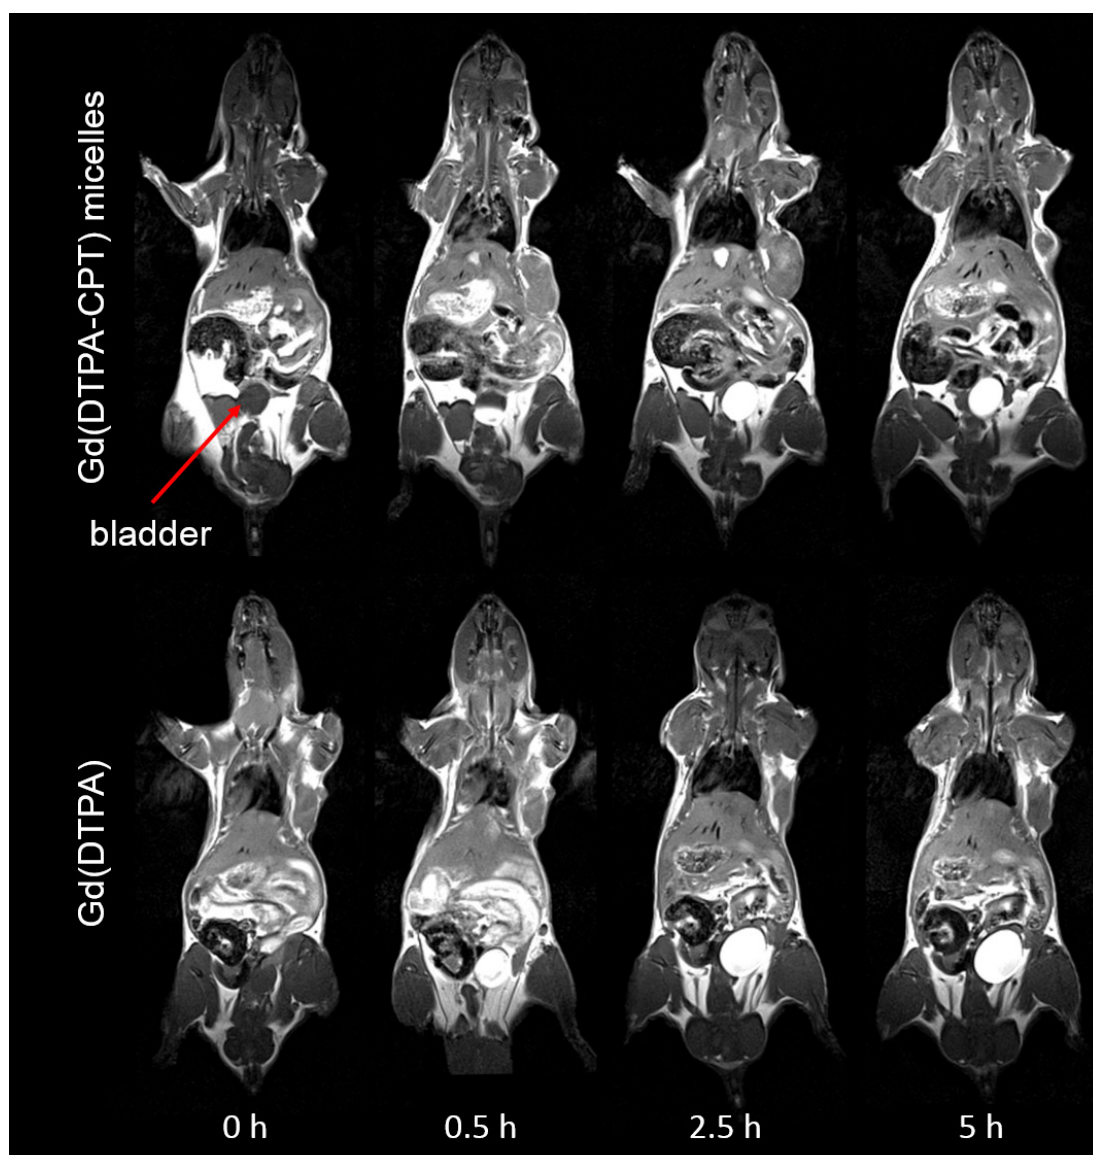

5

1 **Figure S21.** *In vivo*  $T_1$ -weighted MR images of nude mice bearing LoVo tumors at pre-injection and  
2 0.5, 2.5, 5 h after intravenous injection of Gd(DTPA-CPT) nanoparticles and Gd(DTPA) at a dose  
3 of 0.10 mmol kg<sup>-1</sup>. The bladder is represented in the coronal  $T_1$ -weighted MR images of nude mice.

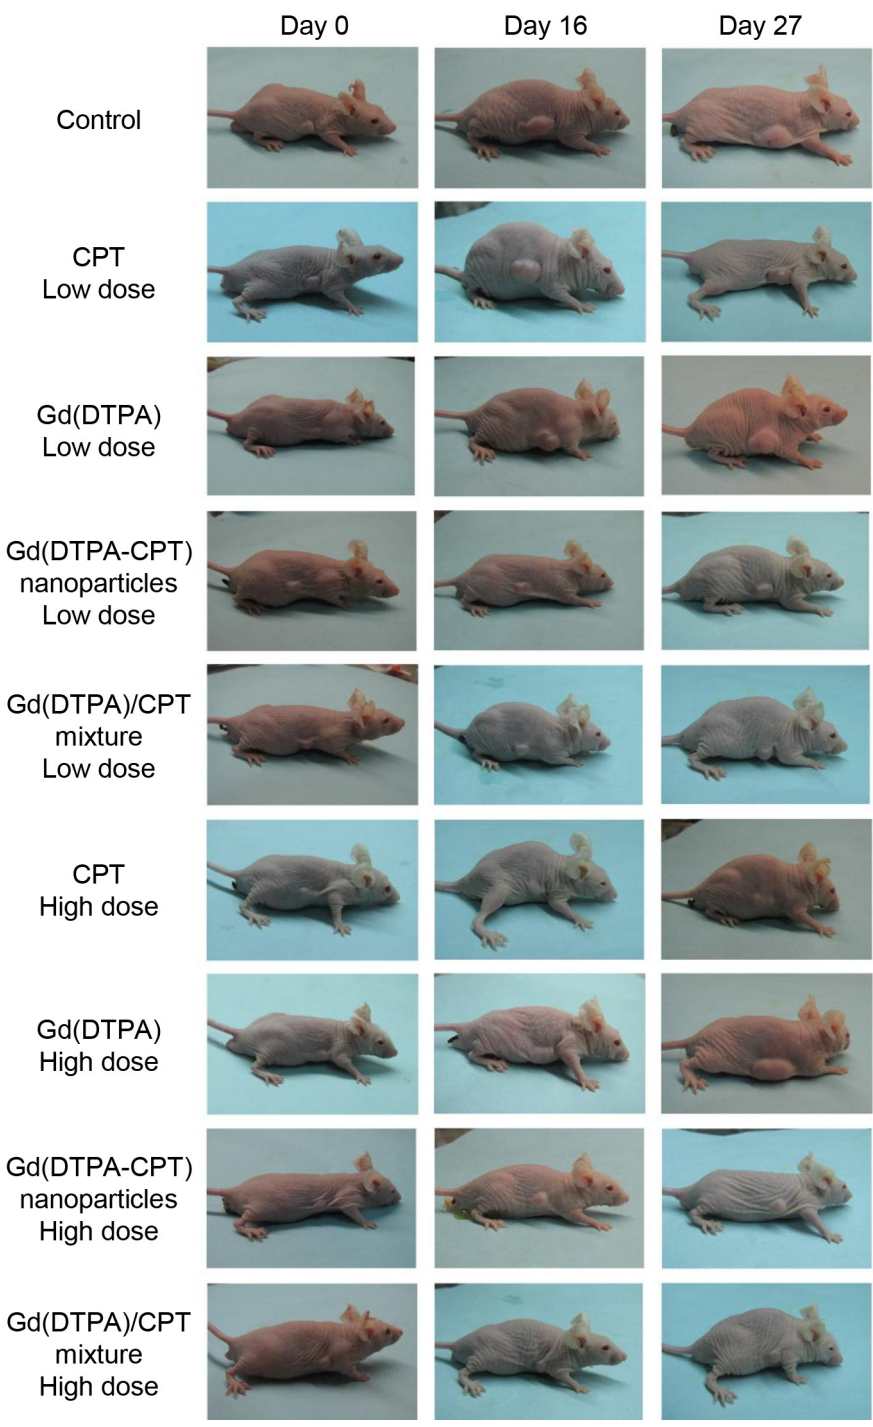

4  
5 **Figure S22.** The mice are treated with different formulations and the tumor size is real-time  
6 monitored during the 27-day evaluation period.

1 **Table S1.** Summary of simulations conducted.

| Systems            | $N_{\text{molecules}}$ | $N_{\text{water}}$ | $L(\text{nm})$ | Time(ns) |
|--------------------|------------------------|--------------------|----------------|----------|
| Gd(DTPA-CPT)       | 25                     | 7614               | 10             | 100      |
|                    | 50                     | 29551              | 15             | 100      |
| PEG- <i>b</i> -PCL | 25                     | 225126             | 30             | 100      |
|                    | 50                     | 343837             | 35             | 100      |

2

3 **Table S2.** The  $\text{IC}_{50}$  values of free CPT, Gd(DTPA-CPT) nanoparticles and Gd(DTPA)/CPT mixture  
4 to Lovo cell line after 24 h, 48 h and 72 h incubation.

| Incubation time | CPT                  | Gd(DTPA-CPT)        | Gd(DTPA)/CPT mixture |
|-----------------|----------------------|---------------------|----------------------|
| 24 h            | 117.37 $\mu\text{M}$ | 60.84 $\mu\text{M}$ | 116.49 $\mu\text{M}$ |
| 48 h            | 0.26 $\mu\text{M}$   | 1.71 $\mu\text{M}$  | 0.29 $\mu\text{M}$   |
| 72 h            | 0.16 $\mu\text{M}$   | 0.062 $\mu\text{M}$ | 0.28 $\mu\text{M}$   |

5

6 **Table S3.** The  $\text{IC}_{50}$  values of free CPT, Gd(DTPA-CPT) nanoparticles and Gd(DTPA)/CPT mixture  
7 to HepG2 cell line after 48 h incubation.

| Incubation time | CPT                | Gd(DTPA-CPT)       | Gd(DTPA)/CPT mixture |
|-----------------|--------------------|--------------------|----------------------|
| 48 h            | 0.99 $\mu\text{M}$ | 0.53 $\mu\text{M}$ | 0.71 $\mu\text{M}$   |

8

9 References:

- 10 [1] S. J. Marrink, H. J. Risselada, S. Yefimov, D. P. Tieleman, A. H. De Vries, *J. Phys. Chem.*  
11 *B* **2007**, *111*, 7812.
- 12 [2] L. Martínez, R. Andrade, E. G. Birgin, J. M. Martínez, *J. Comput. Chem.* **2009**, *30*, 2157.
- 13 [3] D. V. de Spoel, E. Lindahl, B. Hess, A. R. Buuren, E. Apol, P. J. Meulenhoff, D. P.  
14 Tieleman, A. L. Sijbers, K. A. Feenstra, R. Drunen, H. J. Berendsen, D. V. de Spoel, E.

1 Lindahl, B. Hess, A. R. Buuren, E. Apol, P. J. Meulenhoff, D. P. Tieleman, A. L. Sijbers, K.  
2 A. Feenstra, R. Drunen, H. J. Berendsen, *Gromacs User Manual version 4.5* **2010**.

3 [4] Accardo A, Tesauro D, Aloj L, Pedone C, Morelli G. *Coord Chem Rev.* 2009; 253:  
4 2193-213.

5
